# Supplementary material for: Enhanced biodegradation of atrazine at high infiltration rates in agricultural soils
Source: Royal Society of Chemistry journal article supplement (doi:10.1039/c8em00594j), 2019-01-01
Supplement: c8em00594j1.pdf [file c8em00594j1.pdf]

### Enhanced biodegradation of atrazine at high infiltration rates on agricultural soils

Figures:

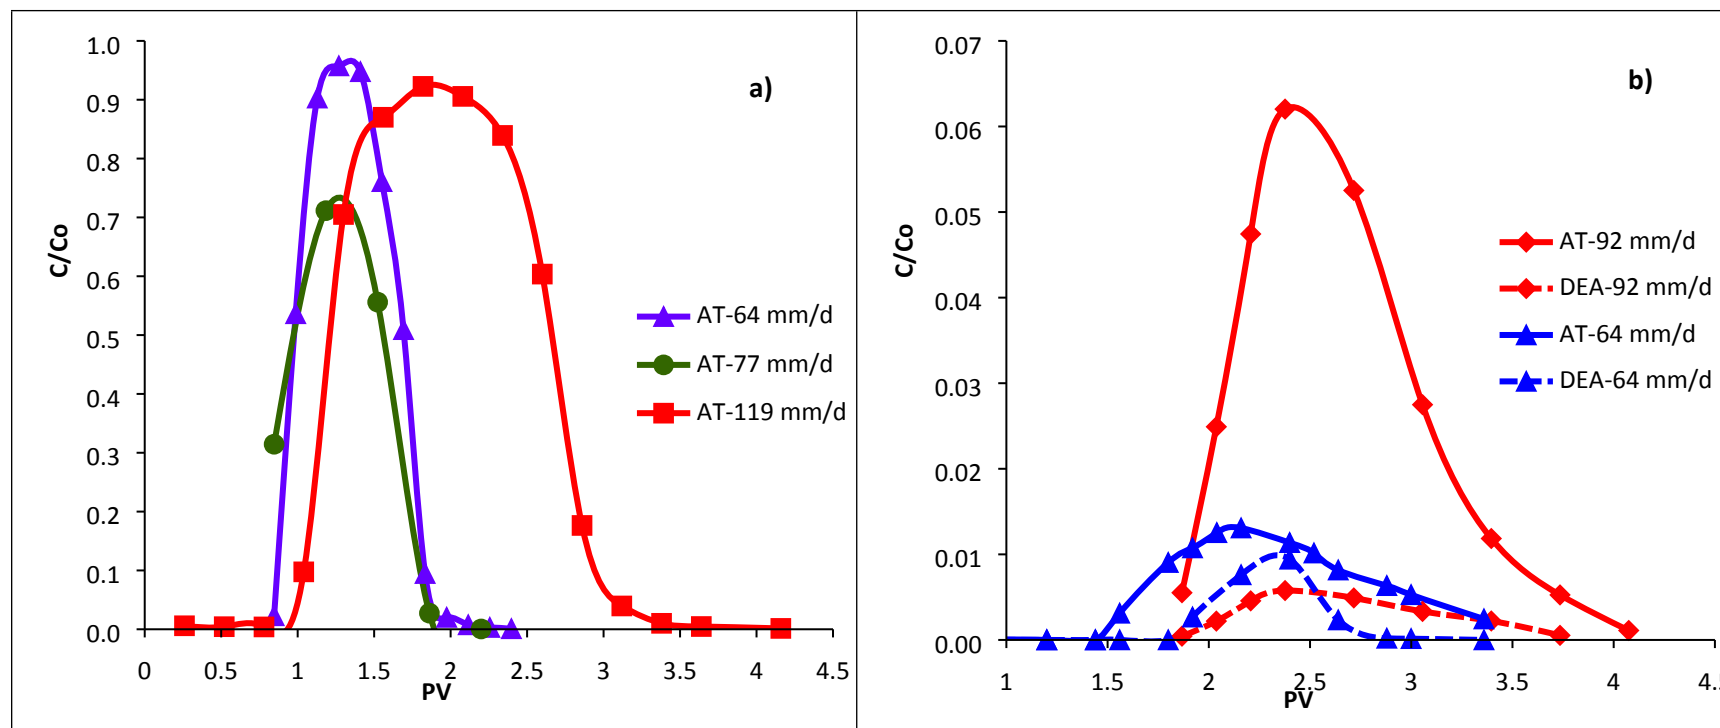

Fig. S1 Atrazine and DEA breakthrough curve for: a) sandy loam and b) loam soil

**Tables:****Table S1**

Analytical method parameters in water samples

| Analyte       | Retention<br>time (min) | Detection<br>limits (ng/mL) | Recovery<br>(%) |
|---------------|-------------------------|-----------------------------|-----------------|
| Terbutylazine | 10.01                   | 15.7                        | 120.2           |
| Atrazine      | 9.44                    | 2.2                         | 116.3           |
| DIA           | 7.79                    | 11.1                        | 81.7            |
| DEA           | 8.01                    | 1.5                         | 116.8           |

**Table S2**

Analytical method parameters in soil samples

| Analyte       | Retention<br>time (min) | Detection<br>limits (ng/g) | Recovery<br>(%) |
|---------------|-------------------------|----------------------------|-----------------|
| Terbutylazine | 28.41                   | 24.6                       | 105.7           |
| Atrazine      | 25.49                   | 9.1                        | 97.8            |
| DIA           | 14.58                   | 22.7                       | 93.4            |
| DEA           | 18.1                    | 14.4                       | 87.5            |
| HA            | 15.46                   | 16.2                       | 89.4            |

### **Relationship between soil moisture content and infiltration rate:**

Table S3 shows the average soil moisture content in columns measured at different depths while atrazine was fed continuously. According to the soil moisture data measured in the sandy loam and loam column experiments, average soil moisture content ranged between 11-45% (40% and higher values indicated that the column reached saturation) over the period of this study. Enhanced atrazine degradation was observed in these columns at this moisture range similar to the degradation data obtained from the batch microcosms at 15% and 25% soil moisture. As it was discussed earlier, in the batch experiments, atrazine experienced a rapid degradation at 15% and 25% soil moisture contents. Atrazine was almost completely degraded at 15% and 25% soil moistures in both sandy loam and loam batch microcosms in about 15 days (Figure 3). Column experiments were run for 30 days. Atrazine was not detectable in the column effluent after approximately 15 d and 25 d for sandy loam and loam, respectively (Figure 1). For the loamy columns, the process was longer (25 d) due to a higher sorption. Both column and batch experiments showed an enhanced degradation of atrazine at high soil moistures. This suggests that in agricultural soils, a synergy of factors such as the history of pesticide application and moisture content have developed an enhancement in atrazine microbial degradation over time.

**Table S3** Soil moisture content in columns

| Soil Type  | Infiltration Rate (mm/d) | Average Soil Moisture Content (%) |       |       |       |
|------------|--------------------------|-----------------------------------|-------|-------|-------|
|            |                          | 0 cm (Top of the column)          | 25 cm | 50 cm | 75 cm |
| Sandy loam | 64                       | 24                                | 26    | 35    | 40*   |
| Sandy loam | 77                       | 32                                | 11    | 15    | 14    |
| Sandy loam | 119                      | 36                                | 21    | 15    | 39    |
| Loam       | 64                       | 45*                               | 18    | 28    | 20    |
| Loam       | 92                       | 45*                               | 44*   | 37    | 30    |

\*Column reached saturation at this depth.

## Detailed description of the model

### Water flow model

The mixed form of Richard's equation is as represented below in Equation (1):

$$\frac{\partial \theta}{\partial t} = \frac{\partial}{\partial t} \left[ K \left( \frac{\partial h}{\partial t} \right) + \frac{\partial K}{\partial t} \right] \quad (S1)$$

$\theta$  represents soil moisture content [ $L^3/L^3$ ];  $h$  is the pressure head [ $L$ ];  $K(h)$  represents the unsaturated hydraulic conductivity [ $L/T$ ];  $t$  is time [ $T$ ] and  $z$  represents the vertical coordinate [ $L$ ] positive upwards.

van Genuchten equations are given below:

$$\theta = \theta_r + \frac{\theta_s - \theta_r}{[1 + (\beta|h|)^\eta]^m} \quad (S2)$$

$$K(h) = K_s S_e^l \left[ 1 - \left( 1 - S_e^m \right)^{m-2} \right] \quad (S3)$$

where  $m=1-1/\eta$ ,  $\eta > 1$

$$S_e = \frac{\theta - \theta_r}{\theta_s - \theta_r} \quad (\text{S4})$$

$S_e$  represents the effective saturation;  $\theta_s$  represents the saturated water content [ $L^3/L^3$ ];  $\theta_r$  represents the residual water content [ $L^3/L^3$ ];  $K_s$  represent the saturated hydraulic conductivity ( $L/T$ ) whereas  $\beta$ ,  $\eta$  and  $l$  are the fitting parameters.

The one-dimensional water flow was described and solved using a mixed form of Richards equation as in Hydrus 1D<sup>1</sup> using the equations proposed by van Genuchten (Equations S1-S4).<sup>2</sup> This equation was solved by a fully implicit finite difference scheme with modified Picard approximation. The discretization of time and space domain is carried out using a backward Euler technique and a central differencing technique.<sup>3</sup> The error criterion specified was  $10^{-2}$ . The mass balance error was close to 0.1%.

## Transport Model

Microbial growth and pesticide degradation can be represented simultaneously by equations S5 and S6.

$$\frac{dX}{dt} = \left( \frac{\mu_m C}{K_C + C} \right) X - k_{decay} X \quad (\text{S5})$$

$$-\frac{dC}{dt} = -\frac{1}{Y} \left( \frac{\mu_m C}{K_C + C} \right) X$$

(S6)

$X$  is the total atrazine degrading soil biomass (ADSB) concentration, expressed on a whole soil volume basis [ $\text{mgL}^{-1}_{\text{tot}}$ ].  $C$  is the dissolved atrazine concentration [ $\text{mgL}^{-1}$ ].  $\mu_m$  is the maximum specific growth of ADSB [ $\text{day}^{-1}$ ].  $K_C$  is the half saturation constant [ $\text{mgL}^{-1}$ ].  $k_{decay}$  is the ADSB decay rate [ $\text{day}^{-1}$ ] and  $Y$  is the ADSB yield i.e. biomass formed per mass of atrazine degraded.

When  $K_s \gg C$ , equation S5 and S6 can be simplified as equation S7 and S8 respectively.

$$\frac{dX}{dt} = \left( \frac{\mu_m C}{K_C} \right) X - k_{decay} X \quad (S7)$$

$$\frac{dC}{dt} = - \frac{1}{Y} \left( \frac{\mu_m C}{K_C} \right) X \quad (S8)$$

Normalizing with initial microbial concentration,  $X_0$  we get,

$$\frac{dX'}{dt} = \left( \frac{\mu_m C}{K_C} \right) X' - k_{decay} X' \quad (S9)$$

$$- \frac{dC}{dt} = - \frac{X_0}{Y} \left( \frac{\mu_m C}{K_C} \right) X' \quad (S10)$$

where  $X' = \frac{X}{X_0}$

Simplifying,  $\frac{X_0}{Y} \left( \frac{\mu_m}{K_C} \right) = A$  and  $\left( \frac{\mu_m}{K_C} \right) = B$

$$\frac{dX'}{dt} = BCX' - k_{decay} X' \quad (S11)$$

$$- \frac{dC}{dt} = - ACX' \quad (S12)$$

Finally, the final transport equation including the degradation and reactive pesticide transport can be represented by equation S13.

$$R \frac{\partial C}{\partial t} = D \frac{\partial^2 C}{\partial z^2} - v \frac{\partial C}{\partial z} - ACX' \quad (S13)$$

The retardation factor  $R$  is  $\left( 1 + \frac{\rho_b K_d}{\theta} \right)$ ,  $D$  is the dispersion coefficient [ $\text{cm}^2 \text{day}^{-1}$ ],  $\theta$  is the volumetric water content [ $\text{L L}^{-1}$ ],  $\rho_b$  is the soil bulk density [ $\text{kg L}^{-1}$ ],  $v$  is the pore water velocity

[cm day<sup>-1</sup>],  $k_{decay}$  is the decay constant [day<sup>-1</sup>],  $K_d$  is the linear adsorption coefficient [L kg<sup>-1</sup>],  $z$  is the length of soil profile [cm] and  $t$  is the time [day].  $A$  and  $B$  are lumped parameters as the Monod kinetic parameters  $\mu_m$ ,  $K_C$  and  $Y$  in the column were not determined from independent batch study and initial microbial concentration ( $X_0$ ) was not measured.  $B$  can be considered as modified maximum specific growth rate and  $A$  can be expressed as is  $(B \frac{X_0}{Y})$ .

The pesticide transport model including the biodegradation term, provided by equations (10-12) is solved using a finite difference scheme. The advection term, representing the hyperbolic component, is discretized using second-order upwind scheme for all the nodes, except the second node where the first-order upwind scheme is used. The dispersive term, representing the parabolic component is discretized using second-order central difference scheme. The advective term and the dispersive terms of the transport equation are solved using fully implicit and semi-implicit finite difference scheme, respectively. The degradation term including the microbial growth and pesticide degradation was explicitly considered.

### References:

- 1 M. R. Kirkland, R. G. Hills and P. J. Wierenga, Algorithms for solving Richards' equation for variably saturated soils, *Water Resour. Res.*, 1992, **28**, 2049–2058.
- 2 M. T. van Genuchten, A closed-form equation for predicting the hydraulic conductivity of unsaturated soils, *Soil Sci. Soc. Am. J.*, 1980, **44**, 892–898.
- 3 M. A. Celia, E. T. Bouloutas and R. L. Zarba, A general mass-conservative numerical solution for the unsaturated flow equation, *Water Resour. Res.*, 1990, **26**, 1483–1496.
